# Supplementary material for: Semantic integration to identify overlapping functional modules in protein interaction networks
Source: PubMed Central journal article supplement (PMC1971074; doi:10.1186/1471-2105-8-265), 2007-07-24
Supplement: 1471-2105-8-265-S2.pdf [file 1471-2105-8-265-S2.pdf]

Young-Rae Cho, et al.

"Semantic integration to identify overlapping functional modules in protein interaction networks"

## Supplementary File 2.

Modularization results of the networks weighted by semantic interactivity *before post-processing*

| number of informative proteins | min flow threshold | average size of modules | average <i>f</i> -measure | average $-\log(p\text{-value})$ |
|--------------------------------|--------------------|-------------------------|---------------------------|---------------------------------|
| 50                             | 0.005              | 139.16                  | 0.373                     | 38.75                           |
| 75                             | 0.020              | 98.32                   | 0.381                     | 37.20                           |
| 100                            | 0.035              | 75.34                   | 0.388                     | 36.58                           |
| 125                            | 0.050              | 60.08                   | 0.400                     | 33.73                           |
| 150                            | 0.067              | 50.78                   | 0.403                     | 31.88                           |
| 175                            | 0.084              | 44.79                   | 0.397                     | 30.31                           |
| 200                            | 0.100              | 39.22                   | 0.399                     | 28.58                           |
| 225                            | 0.115              | 35.70                   | 0.391                     | 27.60                           |
| 250                            | 0.130              | 32.68                   | 0.393                     | 26.35                           |
| 275                            | 0.150              | 29.76                   | 0.378                     | 24.59                           |

Modularization results of the networks weighted by semantic interactivity *after post-processing*

| number of informative proteins | min flow threshold | merging threshold | number of modules | average size of modules | average <i>f</i> -measure | average $-\log(p\text{-value})$ |
|--------------------------------|--------------------|-------------------|-------------------|-------------------------|---------------------------|---------------------------------|
| 50                             | 0.005              | 7.0               | 50                | 139.16                  | 0.373                     | 38.75                           |
| 75                             | 0.020              | 7.0               | 75                | 98.32                   | 0.381                     | 37.20                           |
| 100                            | 0.035              | 7.0               | 100               | 75.34                   | 0.388                     | 36.58                           |
| 125                            | 0.050              | 7.0               | 125               | 60.08                   | 0.400                     | 33.73                           |
| 150                            | 0.067              | 7.0               | 144               | 52.08                   | 0.406                     | 32.28                           |
| 175                            | 0.084              | 7.0               | 166               | 46.22                   | 0.399                     | 30.84                           |
| 200                            | 0.100              | 7.0               | 189               | 40.40                   | 0.401                     | 29.05                           |
| 225                            | 0.115              | 7.0               | 209               | 36.76                   | 0.393                     | 27.85                           |
| 250                            | 0.130              | 7.0               | 232               | 33.53                   | 0.394                     | 26.53                           |
| 275                            | 0.150              | 7.0               | 250               | 30.66                   | 0.380                     | 24.86                           |
