# Supplementary material for: Semantic integration to identify overlapping functional modules in protein interaction networks
Source: Springer Nature journal article supplement (doi:10.1186/1471-2105-8-265), 2007-07-24
Supplement: 12859_2007_1637_MOESM1_ESM.pdf [file 12859_2007_1637_MOESM1_ESM.pdf]

Young-Rae Cho, et al.

"Semantic integration to identify overlapping functional modules in protein interaction networks"

### Supplementary File 1.

Modularization results of the networks weighted by semantic similarity *before post-processing*

| number of informative proteins | min flow threshold | average size of modules | average <i>f</i> -measure | average $-\log(p\text{-value})$ |
|--------------------------------|--------------------|-------------------------|---------------------------|---------------------------------|
| 50                             | 0.180              | 117.82                  | 0.367                     | 34.51                           |
| 75                             | 0.220              | 91.12                   | 0.365                     | 32.55                           |
| 100                            | 0.260              | 74.60                   | 0.366                     | 31.32                           |
| 125                            | 0.300              | 63.58                   | 0.360                     | 29.71                           |
| 150                            | 0.333              | 55.14                   | 0.353                     | 27.47                           |
| 175                            | 0.367              | 48.53                   | 0.344                     | 26.05                           |
| 200                            | 0.400              | 43.37                   | 0.334                     | 24.10                           |
| 225                            | 0.425              | 39.79                   | 0.330                     | 23.16                           |
| 250                            | 0.450              | 36.55                   | 0.325                     | 22.06                           |
| 275                            | 0.480              | 33.55                   | 0.320                     | 20.72                           |

Modularization results of the networks weighted by semantic similarity *after post-processing*

| number of informative proteins | min flow threshold | merging threshold | number of modules | average size of modules | average <i>f</i> -measure | average $-\log(p\text{-value})$ |
|--------------------------------|--------------------|-------------------|-------------------|-------------------------|---------------------------|---------------------------------|
| 50                             | 0.180              | 8.5               | 50                | 117.82                  | 0.367                     | 34.51                           |
| 75                             | 0.220              | 8.5               | 75                | 91.12                   | 0.365                     | 32.55                           |
| 100                            | 0.260              | 8.5               | 98                | 75.34                   | 0.366                     | 31.22                           |
| 125                            | 0.300              | 8.5               | 118               | 65.43                   | 0.360                     | 29.77                           |
| 150                            | 0.333              | 8.5               | 140               | 56.99                   | 0.354                     | 27.55                           |
| 175                            | 0.367              | 8.5               | 159               | 51.03                   | 0.347                     | 26.37                           |
| 200                            | 0.400              | 8.5               | 178               | 46.14                   | 0.337                     | 24.42                           |
| 225                            | 0.425              | 8.5               | 200               | 42.22                   | 0.333                     | 23.37                           |
| 250                            | 0.450              | 8.5               | 222               | 38.77                   | 0.327                     | 22.27                           |
| 275                            | 0.480              | 8.5               | 243               | 35.58                   | 0.320                     | 20.82                           |
