# Supplementary material for: Semantic integration to identify overlapping functional modules in protein interaction networks
Source: Springer Nature journal article supplement (doi:10.1186/1471-2105-8-265), 2007-07-24
Supplement: 12859_2007_1637_MOESM4_ESM.pdf [file 12859_2007_1637_MOESM4_ESM.pdf]

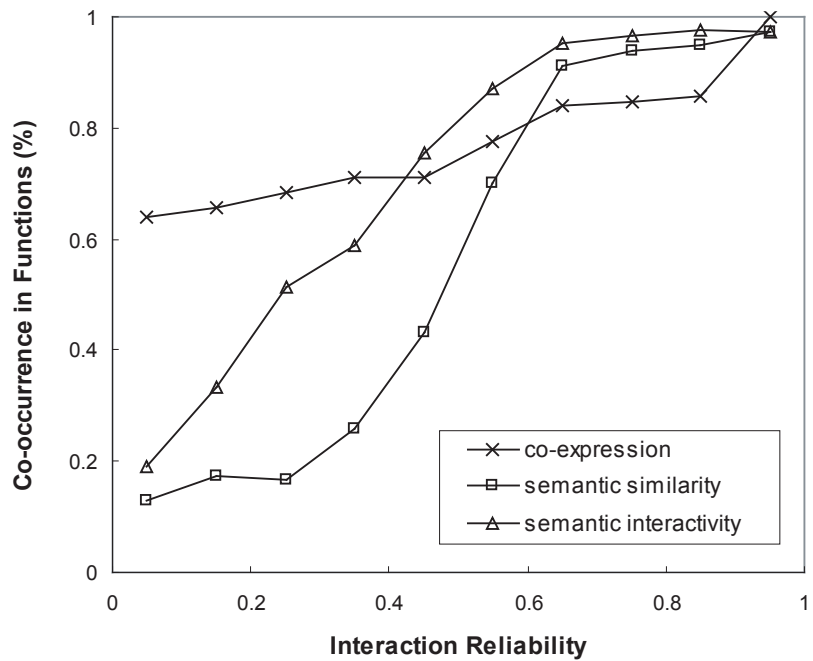

(a)

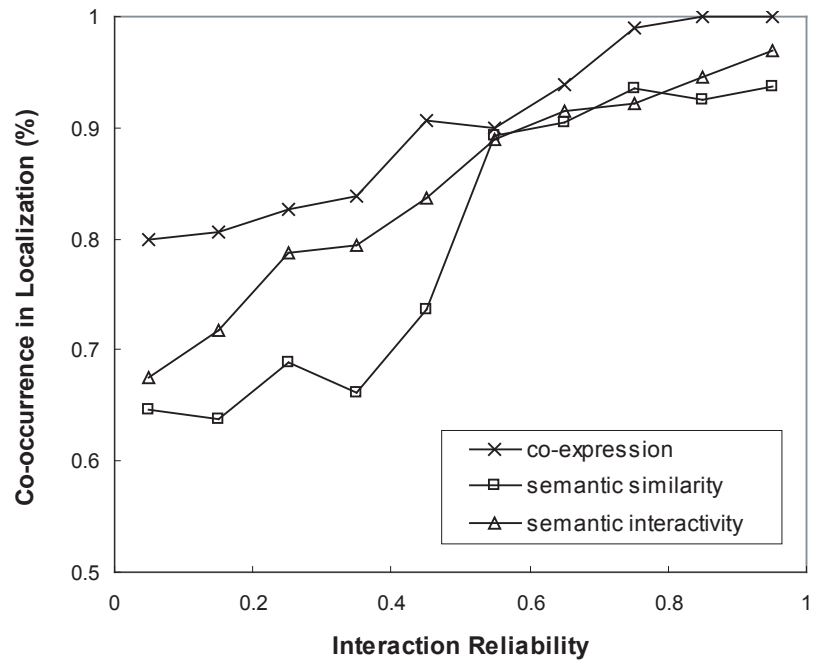

(b)
